# Supplementary figures and images for: The healthy donor effect and survey participation, becoming a donor and donor career
Source: PubMed Central journal article supplement — Transfusion. 2022 Dec 8;63(1):143–55. doi: 10.1111/trf.17190 (PMC10107247; doi:10.1111/trf.17190), 2022-12-08

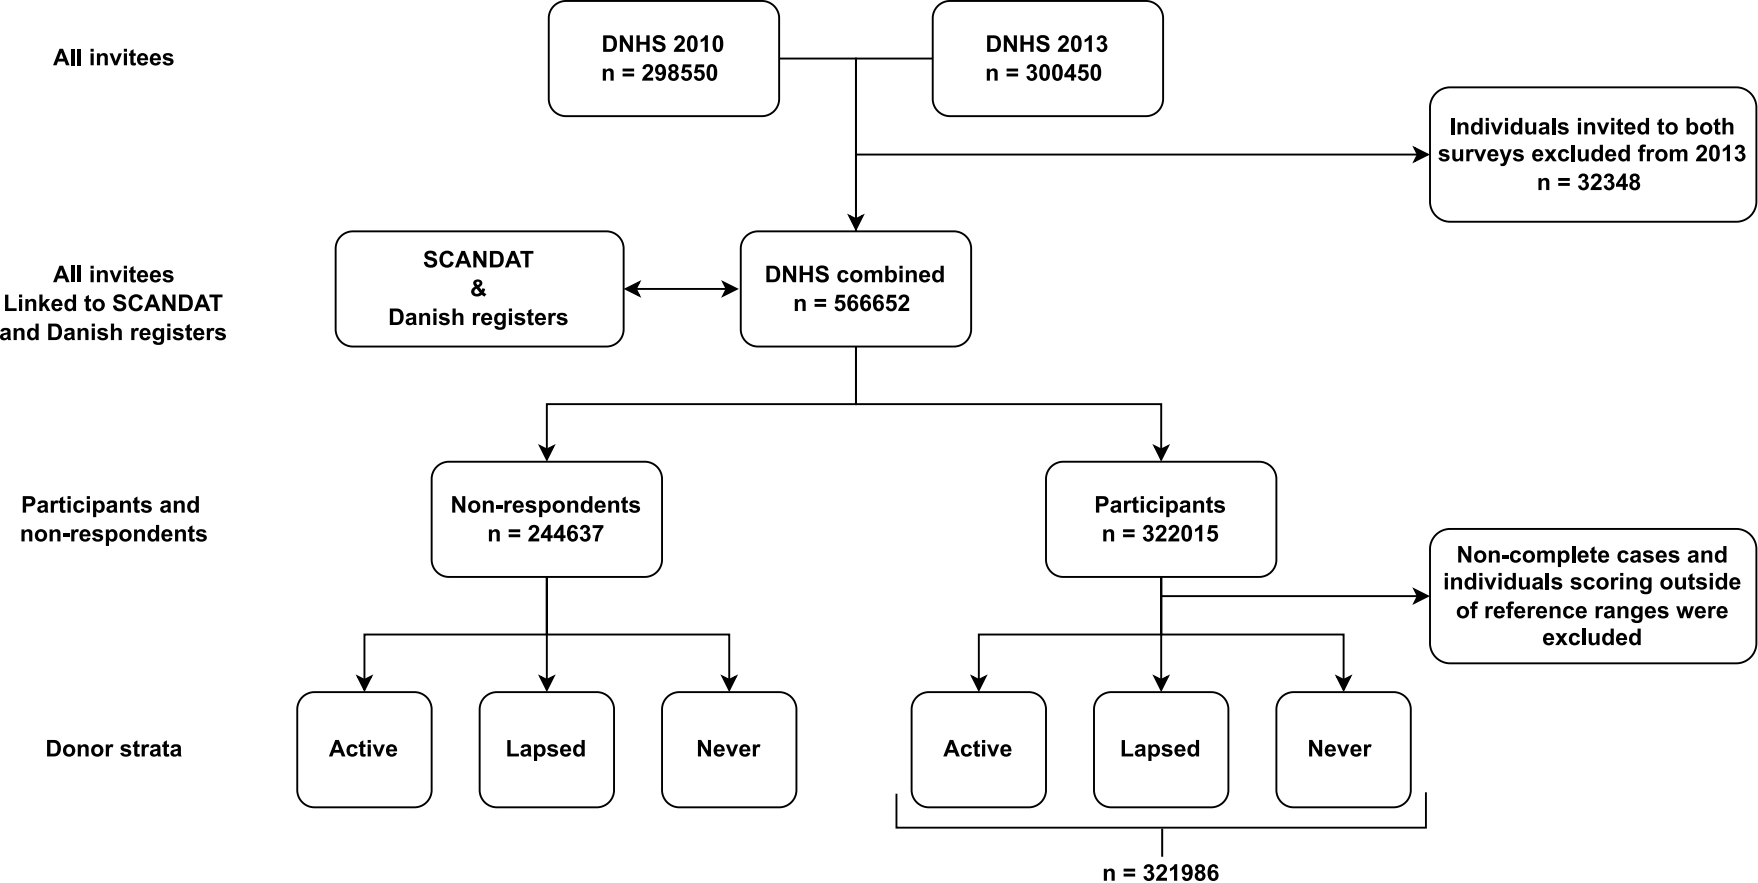

Supplement: TRF-63-143-s001.pdf [file TRF-63-143-s001.pdf]
